# Supplementary material
Source: Springer Nature journal article supplement (https://www.springermedizin.de/resource/supplementary/12888_2005_154_MOESM2_ESM.pdf/9482016)

a.

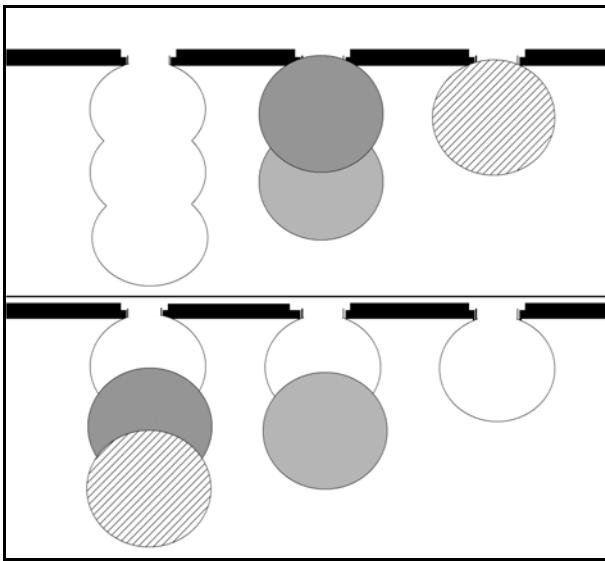

← Goal configuration

← Start configuration

b.

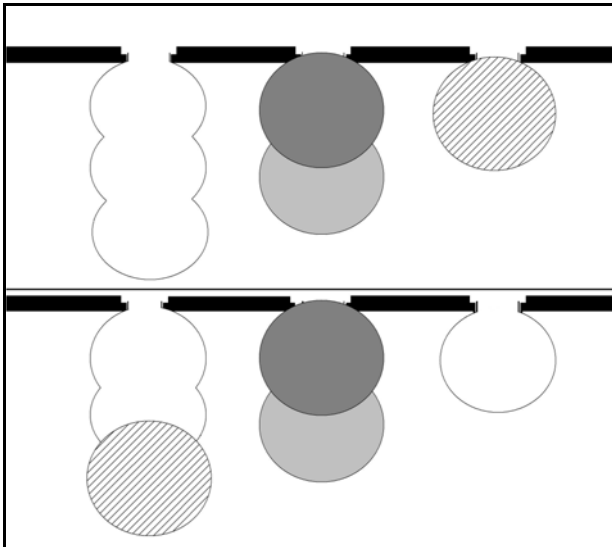

Move 1

c.

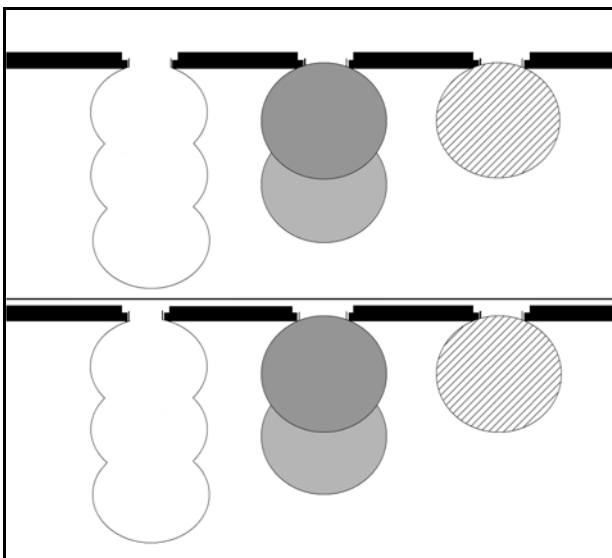

Move 2

Supplement: MOESM2 [file 9482016]
